# Supplementary material for: Leishmania infantum arginase: biochemical characterization and inhibition by naturally occurring phenolic substances
Source: PubMed Central journal article supplement (PMC6534257; doi:10.1080/14756366.2019.1616182), 2019-05-24
Supplement: IENZ_A_1616182_SM3036.pdf [file IENZ_A_1616182_SM3036.pdf]

**Supplemental Material—*Leishmania infantum* arginase: biochemical characterization and inhibition by naturally occurring phenolic substances**

Andreza R. Garcia<sup>1</sup>, Danielle M. P. Oliveira<sup>2</sup>, Ana Claudia F. Amaral<sup>3</sup>, Jéssica B. Jesus<sup>4</sup>, Ana Carolina Rennó Sodero<sup>4</sup>, Alessandra M. T. Souza<sup>4</sup>, Claudiu T. Supuran<sup>5\*</sup>, Alane B. Vermelho<sup>6</sup>, Igor A. Rodrigues<sup>1,7</sup>, Anderson S. Pinheiro<sup>2</sup>

<sup>1</sup>Graduate Program in Pharmaceutical Sciences, School of Pharmacy, Federal University of Rio de Janeiro, 21949-900, RJ, Brazil.

<sup>2</sup>Department of Biochemistry, Institute of Chemistry, Federal University of Rio de Janeiro, 21941-909, RJ, Brazil.

<sup>3</sup>Department of Natural Products, Farmanguinhos, FIOCRUZ, 22775-903, RJ, Brazil.

<sup>4</sup>Department of Drugs and Medicines, School of Pharmacy, Federal University of Rio de Janeiro, 21941-590, RJ, Brazil.

<sup>5</sup>NEUROFARBA Department, Università degli Studi di Firenze, Sezione di Scienze Farmaceutiche, Florence, Italy.

<sup>6</sup>Department of General Microbiology, Institute of Microbiology Paulo de Goes, Federal University of Rio de Janeiro, 21941-970, RJ, Brazil.

<sup>7</sup>Department of Natural Products and Food, School of Pharmacy, Federal University of Rio de Janeiro, 21941-902, RJ, Brazil.

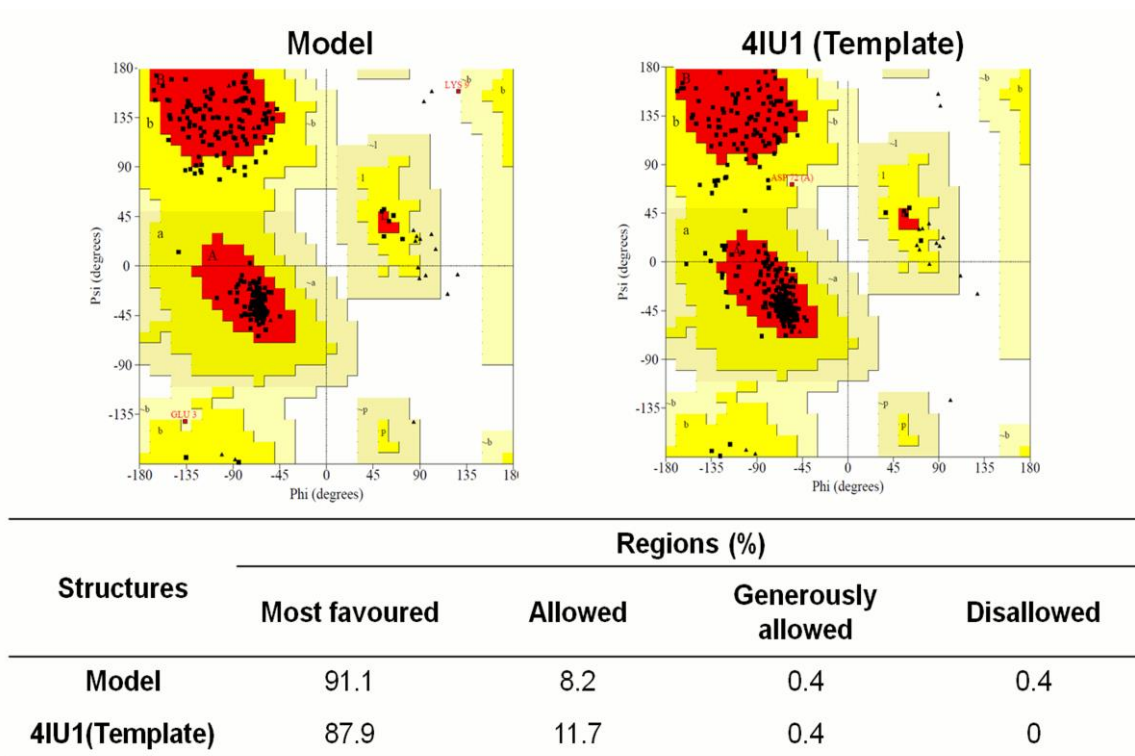

**Supplemental Figure S1:** Ramachandran plot of ARGLi three-dimensional model in comparison to the *L. mexicana* arginase (PDB 4IU1) template.

**A**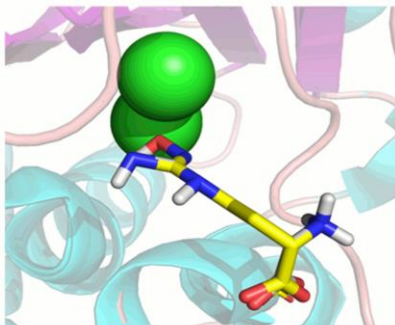**B**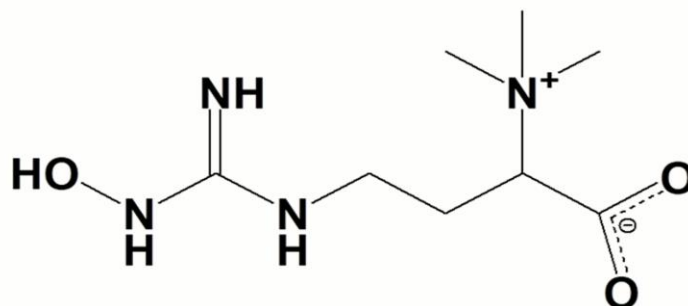

**Supplemental Figure S2:** (A) 3D structure alignment of the ligand conformation obtained from redocking (white) and the crystallographic structure (yellow). (B) 2D structure of the Nor-N-Omega-Hydroxy-L-Arginine (NNH) inhibitor co-crystallized with *L. mexicana* arginase (PDB 4IU1) used to validate the molecular docking protocol.
